# Supplementary material
Source: Springer Nature journal article supplement (https://www.springermedizin.de/resource/supplementary/12889_2012_5388_MOESM1_ESM.pdf/9495290)

**Lung cancer**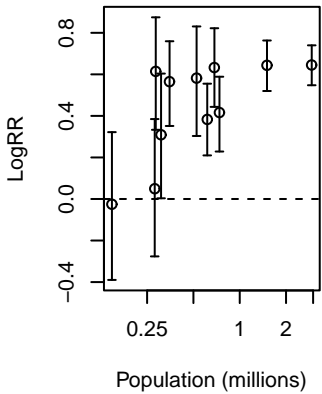**Prostate cancer**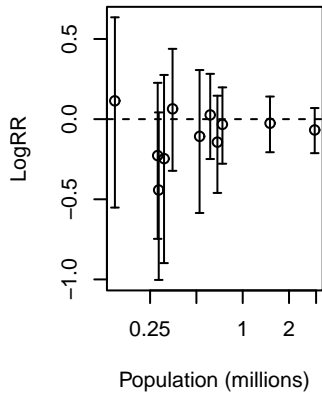**Diabetes**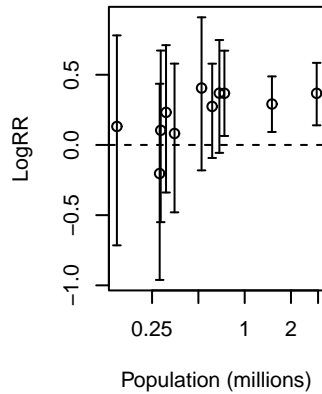**Mental diseases**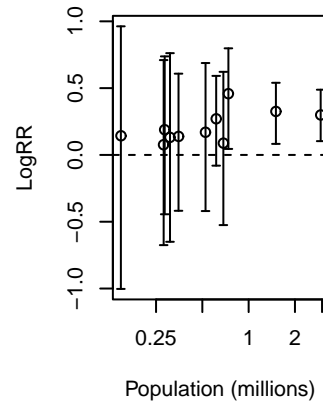**Alzheimer's disease**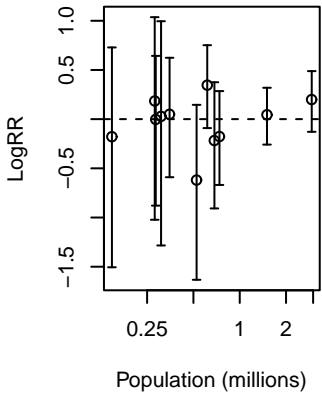**Ischaemic heart disease**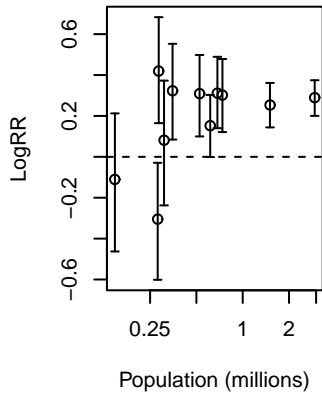**Cerebrovascular diseases**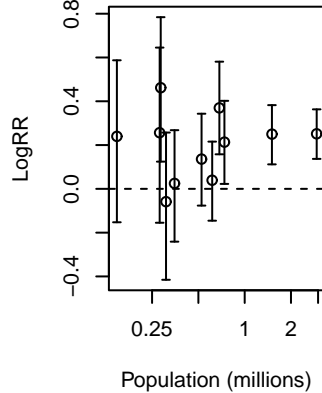**Respiratory diseases**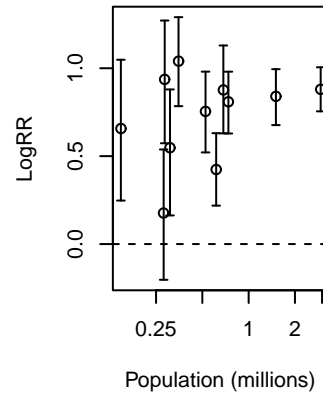**Cirrhosis**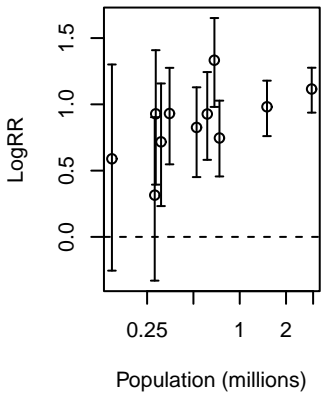**All causes of mortality**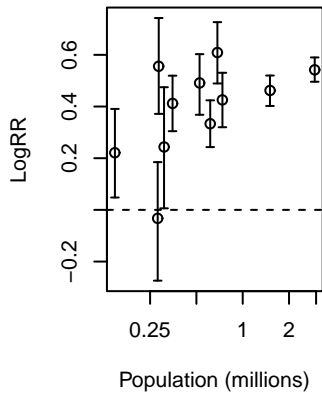

Supplement: MOESM1 [file 9495290]
